# Supplementary material for: Changes in copper, zinc and cadmium distributions in the liver of Formosan squirrels with characteristic high copper accumulation
Source: Royal Society of Chemistry journal article supplement (doi:10.1039/c9mt00204a), 2019-01-01
Supplement: c9mt00204a1.pdf [file c9mt00204a1.pdf]

*Supporting information for*

Title: **Changes in copper, zinc and cadmium distributions in the liver of Formosan squirrels with characteristic high copper accumulation**

Authors: Yoshinari Suzuki<sup>1\*</sup>, Yasumitsu Ogra<sup>2</sup>, Noboru Machida<sup>3</sup>, and Izumi Watanabe<sup>1</sup>

<sup>1</sup>United Graduate School of Agricultural Science, Tokyo University of Agriculture and Technology, 3-5-8 Saiwai-cho, Fuchu-shi, Tokyo 183-8509, Japan

<sup>2</sup>Graduate School of Pharmaceutical Science, Chiba University, 1-8-1 Inohana, Chuou-ku, Chiba-shi, Chiba 260-8675, Japan

<sup>3</sup>Department of Veterinary Oncology, Tokyo University of Agriculture and Technology, 3-5-8 Saiwai-cho, Fuchu-shi, Tokyo 183-8509, Japan

Corresponding author: Yoshinari Suzuki

e-mail address: szk-yoshi@nihs.go.jp

Table S1

| Sample ID | Hydropic degeneration | Sex    | Growth stage | Hepatic Cu |
|-----------|-----------------------|--------|--------------|------------|
| 051031-2  | -                     | Male   | Juvenile     | 38.1       |
| 060804    | -                     | Female | Juvenile     | 43.2       |
| 051117    | -                     | Male   | Young        | 101        |
| 050207    | -                     | Female | Young        | 154        |
| 041230-2  | -                     | Male   | Young        | 302        |
| 060802    | -                     | Female | Adult        | 359        |
| 040923    | -                     | Female | Adult        | 412        |
| 050602    | -                     | Male   | Adult        | 756        |
| 060118    | -                     | Male   | Adult        | 857        |
| 051031-1  | -                     | Male   | Young        | 858        |
| 041209    | -                     | Male   | Adult        | 1004       |
| 041230    | -                     | Male   | Adult        | 1238       |
| 040919    | -                     | Male   | Adult        | 1373       |
| 060111    | +                     | Female | Juvenile     | 6.3        |
| 060809-1  | +                     | Female | Young        | 126        |
| 050613-1  | +                     | Female | Young        | 213        |
| 051107    | +                     | Female | Young        | 246        |
| 060809-2  | +                     | Female | Young        | 250        |
| 050210    | +                     | Female | Adult        | 262        |
| 060112    | +                     | Male   | Young        | 305        |
| 040920    | +                     | Male   | Adult        | 346        |
| 040918    | +                     | Female | Adult        | 495        |
| 060124    | +                     | Male   | Adult        | 533        |
| 040921    | +                     | Male   | Adult        | 703        |
| 050117    | +                     | Male   | Adult        | 797        |
| 050418    | +                     | Male   | Adult        | 1038       |
| 040922    | +                     | Male   | Adult        | 1742       |

\*Sample ID express YYMMDD.

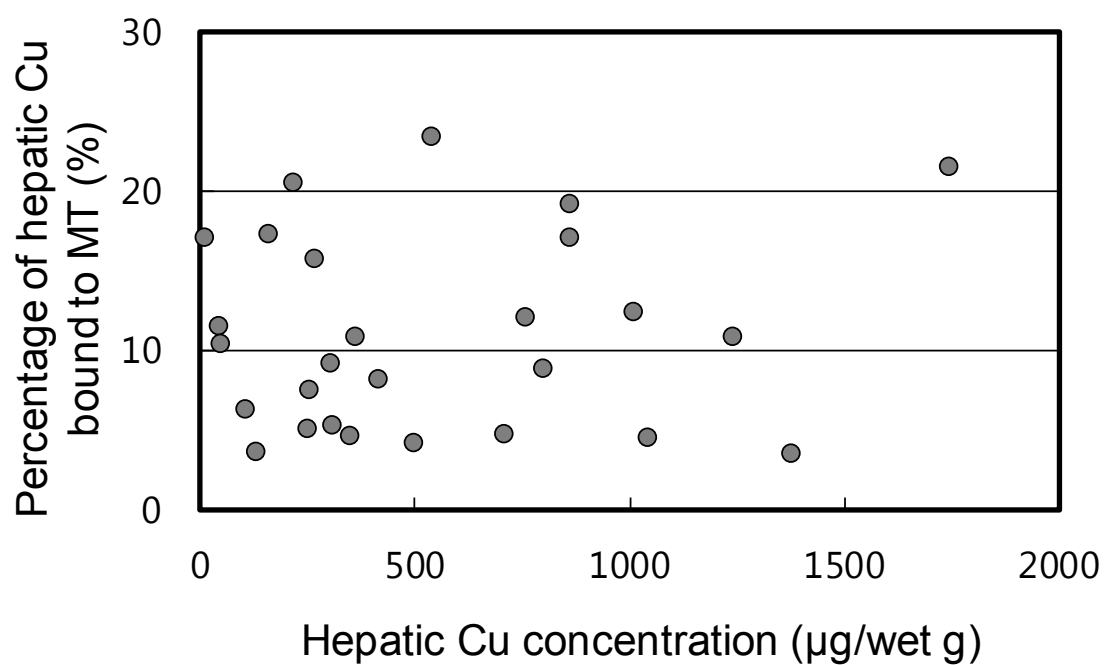

Fig. S1. Relationship between hepatic Cu concentration and percentage of hepatic Cu bound to metallothionein
